# Supplementary material for: Y705 and S727 are required for the mitochondrial import and transcriptional activities of STAT3, and for regulation of stem cell proliferation
Source: PubMed Central journal article supplement (PMC8451946; doi:10.1242/dev.199477), 2021-09-06
Supplement: develop-148-199477-s1.pdf [file develop-148-199477-s1.pdf]

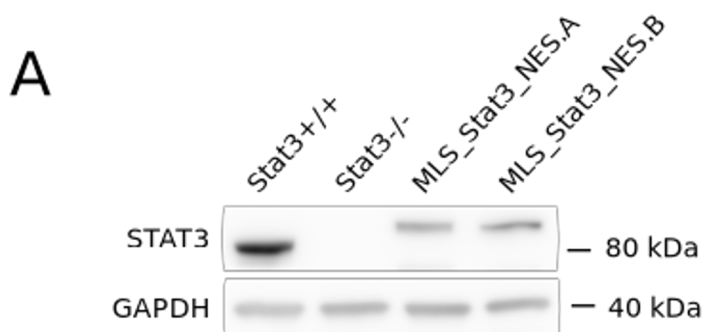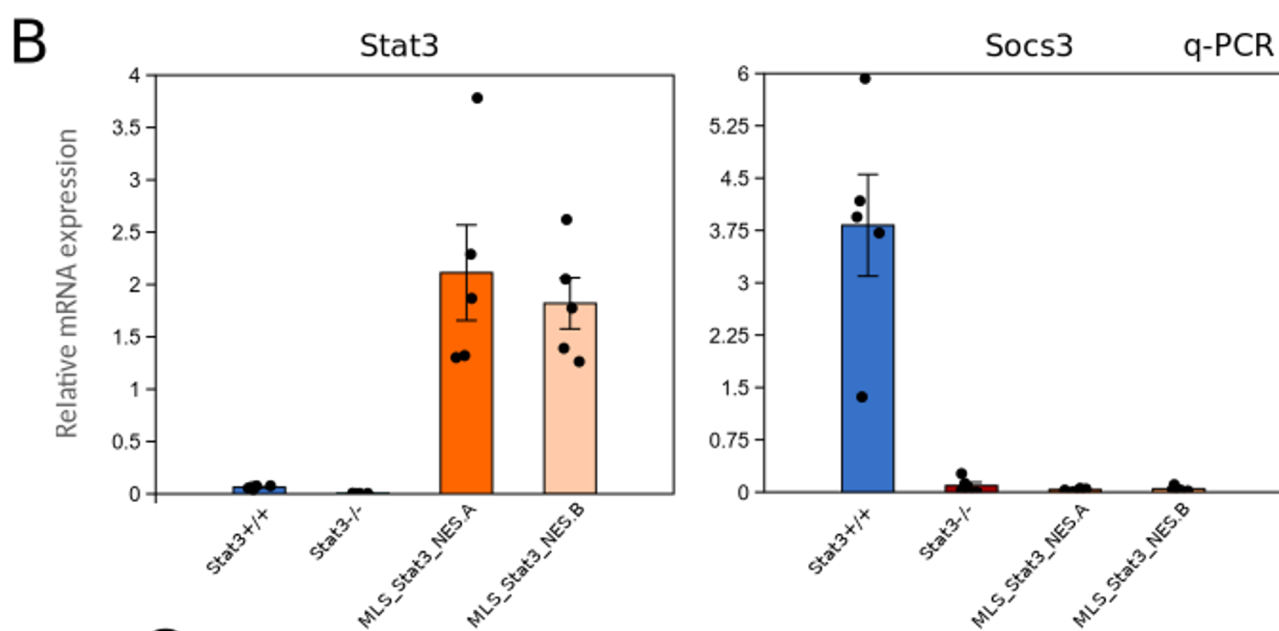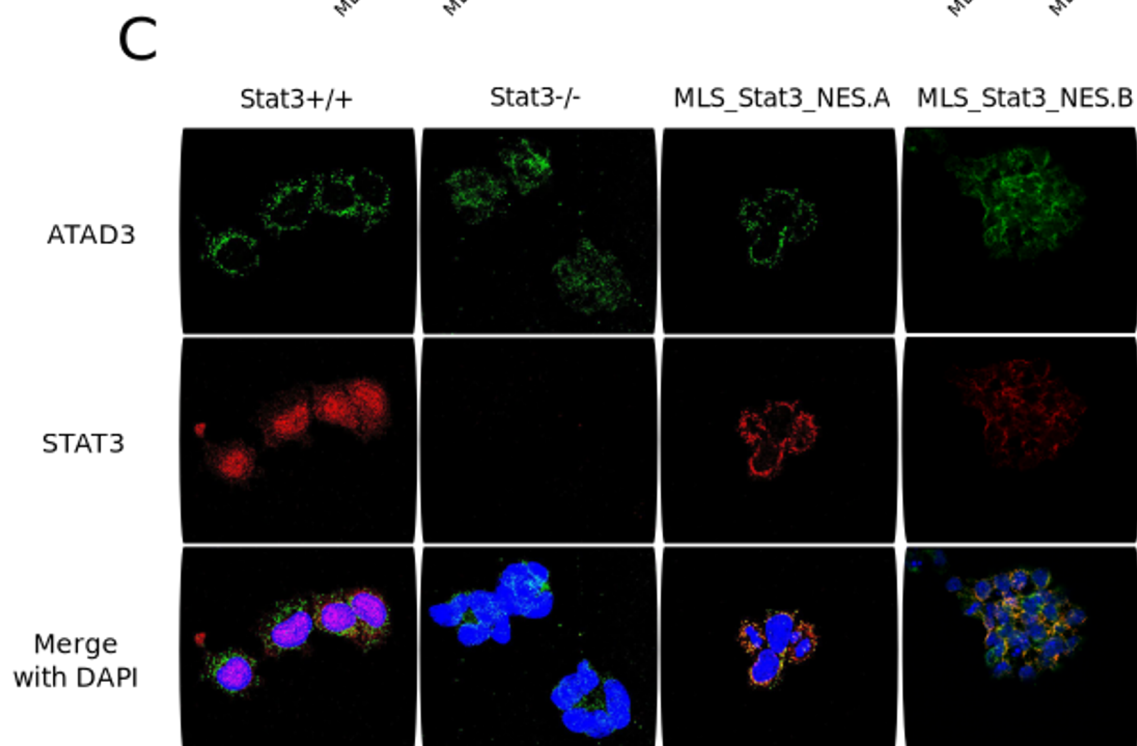

**Fig. S1. Validation of the *MLS\_Stat3\_NES* construct in murine Embryonic Stem Cells.** **A:** Western blot for total STAT3 on *Stat3*<sup>+/+</sup>, *Stat3*<sup>-/-</sup> and *MLS\_Stat3\_NES* cells. Note the shift in molecular weight due to the presence of MLS and NES tags. STAT3 protein level in both *MLS\_Stat3\_NES* clones is lower than *Stat3*<sup>+/+</sup> cells. **B:** qPCR analysis of the *Stat3* and its nuclear target gene *Socs3*. Gene expression analysis of *Stat3*<sup>+/+</sup> cells, *Stat3*<sup>-/-</sup> cells, and two *MLS\_Stat3\_NES* clones (A/B) cultured in presence of LIF. Note that both clones have the same undetectable level of *Socs3* and *Stat3*<sup>-/-</sup> cells. **C:** Representative confocal images of *Stat3*<sup>+/+</sup>, *Stat3*<sup>-/-</sup> and *MLS\_Stat3\_NES* cells stained with anti-STAT3 and anti-ATAD3 antibodies. Merge image shows co-localization between STAT3 and the nucleoids marked by ATAD3; DAPI serves as a nuclear counterstain. Scale bar: 20  $\mu$ m.

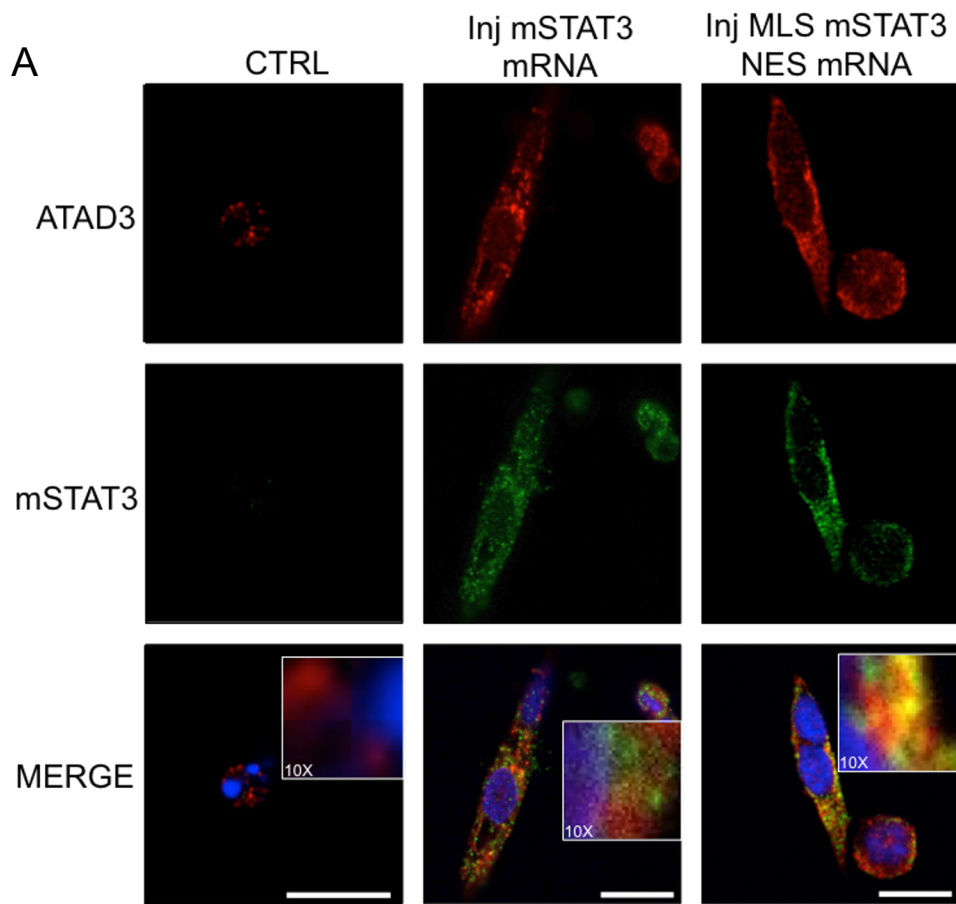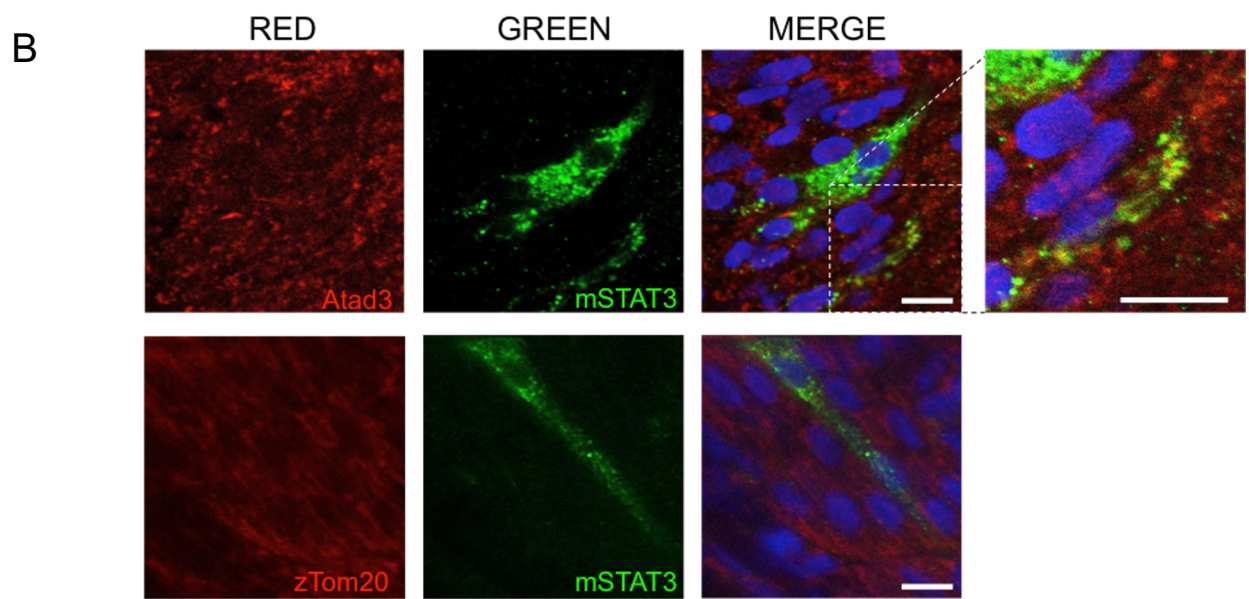

**Fig. S2. Validation of the injected mRNAs on zebrafish. A:** IF on zebrafish cells, dissociated and plated from 24-hpf embryos injected with *mStat3* and *MLS\_mStat3* mRNA. The antibody reveals the expression of mSTAT3 (green). The mito-targeted STAT3 co-localizes with ATAD3 (red), a marker of mitochondrial nucleoids, confirming the correct subcellular localization of the proteins. Conversely the analysis of cells from embryos injected with *mStat3* mRNA results in a more diffused staining. Scale bar = 10um. **B:** Whole mount IF on 24-hpf zebrafish embryos injected with pCS2 + *MLS\_mSTAT3\_NES* plasmid. The mosaic expression is driven by a CMV promoter to verify the intracellular localization of the murine protein. mSTAT3 (green) staining confirms the expected mitochondrial localization of the protein.

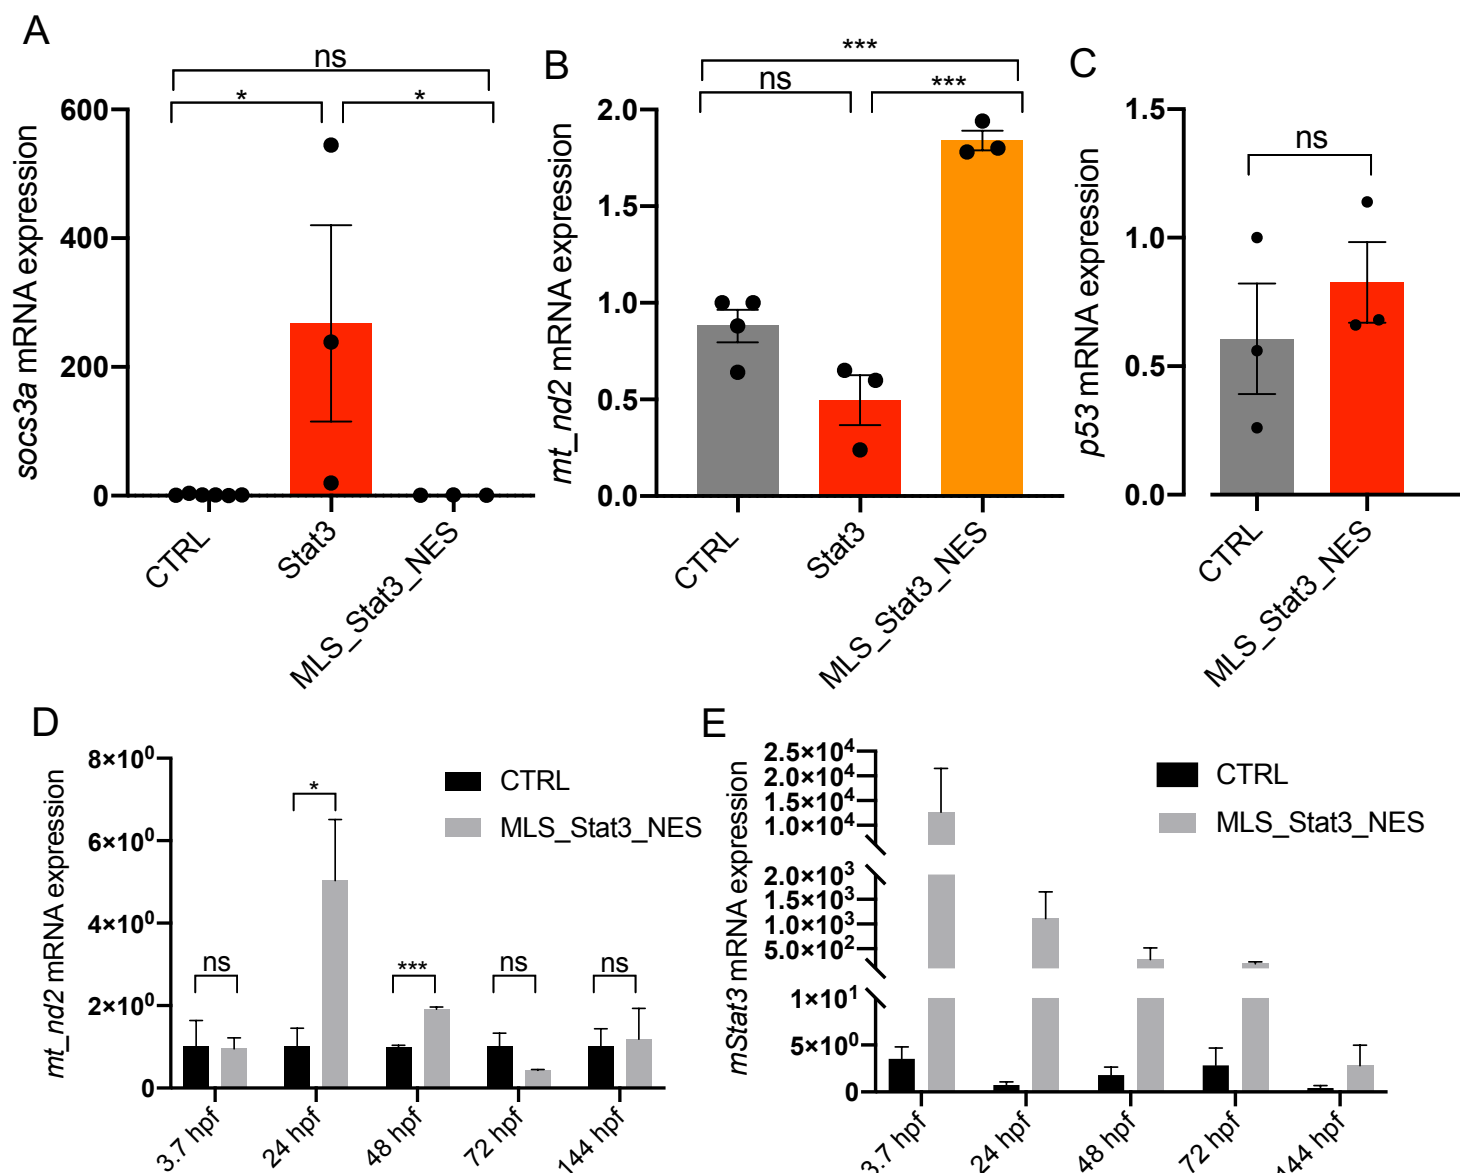

**Fig. S3. Validation of effects of *mStat3* and *MLS\_Stat3\_NES* mRNA injected in zebrafish embryos** **A:** qRT-PCR analysis of *socs3a* mRNA levels in 48-hpf embryos injected with *mStat3* and *MLS\_mStat3\_NES*. **B:** qRT-PCR analysis of *mt\_nd2* mRNA levels in *mStat3* and *MLS\_mStat3\_NES* 48-hpf injected embryos. **C:** qRT-PCR analysis of *p53* mRNA in 48-hpf larvae injected with *MLS\_mStat3\_NES*. **D:** qRT-PCR analysis of *mt\_nd2* levels from 3.7 hpf to 6 dpf, in larvae injected with *mStat3* mRNA. **E:** qRT-PCR analysis of *mStat3* levels from 3.7 hpf to 6 dpf, in larvae injected with *mStat3* mRNA. *bactin* was used as an internal control. Statistical analysis was performed by unpaired t-test on 3 independent biological samples (where n not specified). \* $p < 0.05$ ; \*\*\* $p < 0.001$ ; ns=not significant; error bars=SEM.

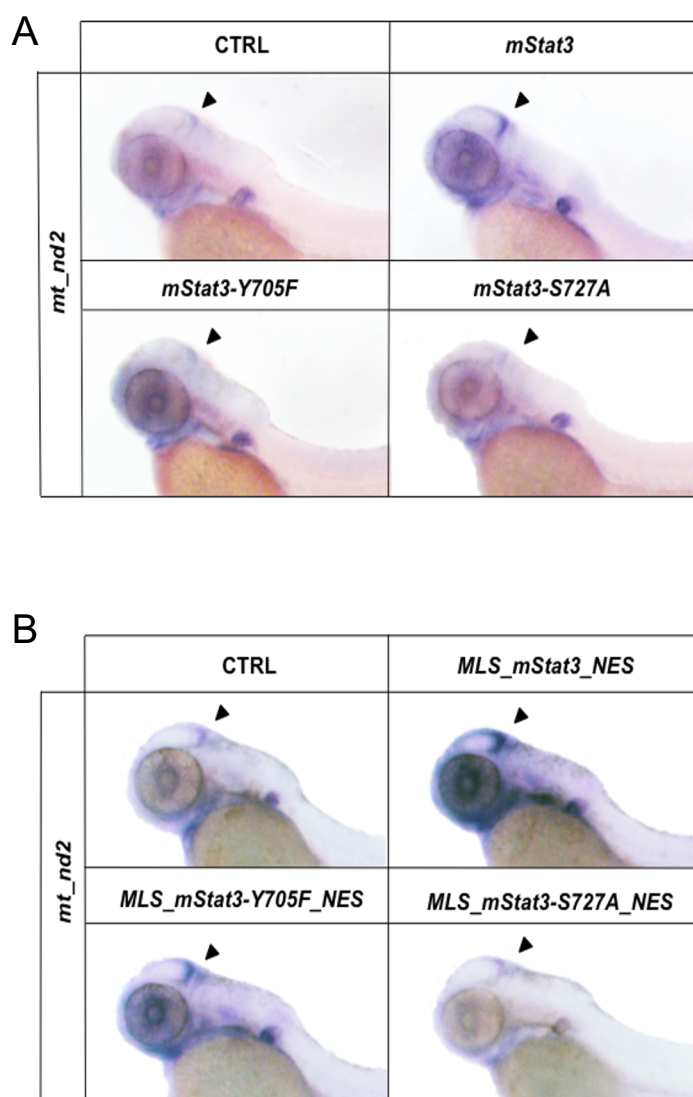

**Fig. S4. STAT3-dependent mitochondrial transcription depends on Y705 and S727 phosphorylations. A:** WISH with anti-*mt\_nd2* mRNA probe in 48-hpf uninjected embryos (11 embryos out of 14 showed the reported signal) and embryos injected with either *mStat3* (15 embryos out of 15 showed the reported signal), *mStat3-Y705F* (17 embryos out of 18 showed the reported signal) or *mStat3-S727A* (15 embryos out of 17 showed the reported signal). **B:** WISH with anti-*mt\_nd2* mRNA probe in 48-hpf uninjected embryo (24 larvae out of 24 showed the reported signal) and embryos injected with either *MLS\_mStat3\_NES* (21 larvae out of 31 showed the reported signal), *MLS\_mStat3\_NES Y705F* (19 larvae out of 20 showed the reported signal) or *MLS\_mStat3\_NES S727A* (17 larvae out of 21 showed the reported signal).

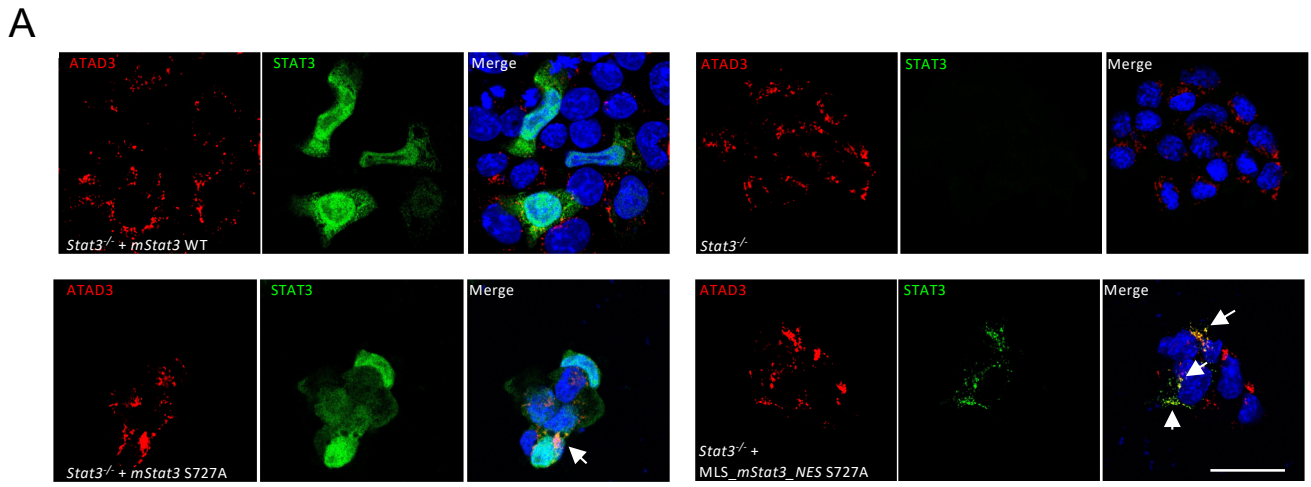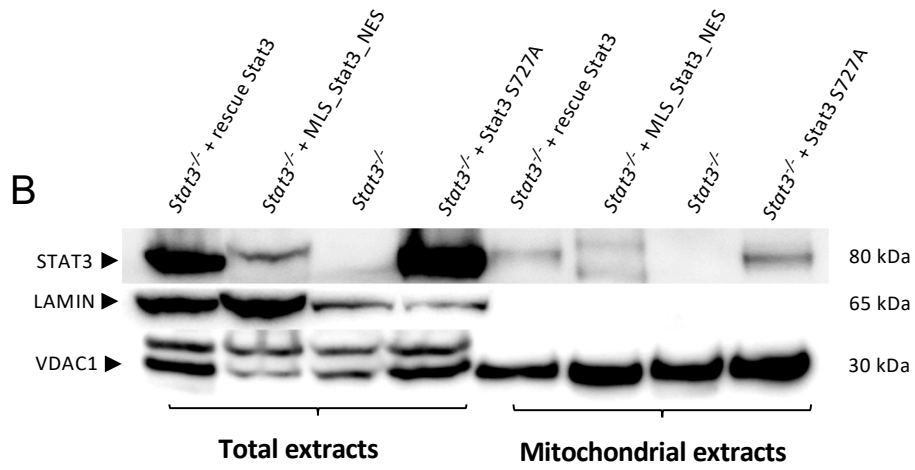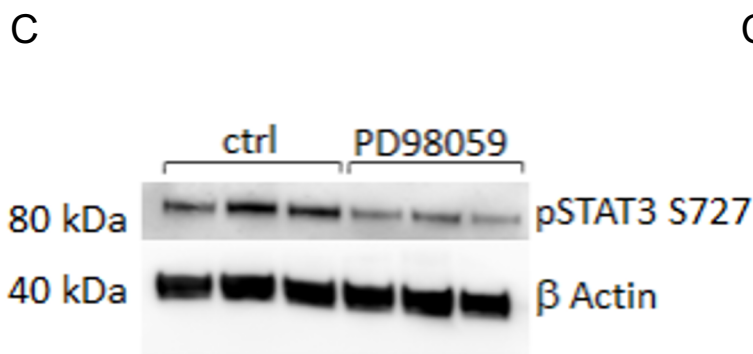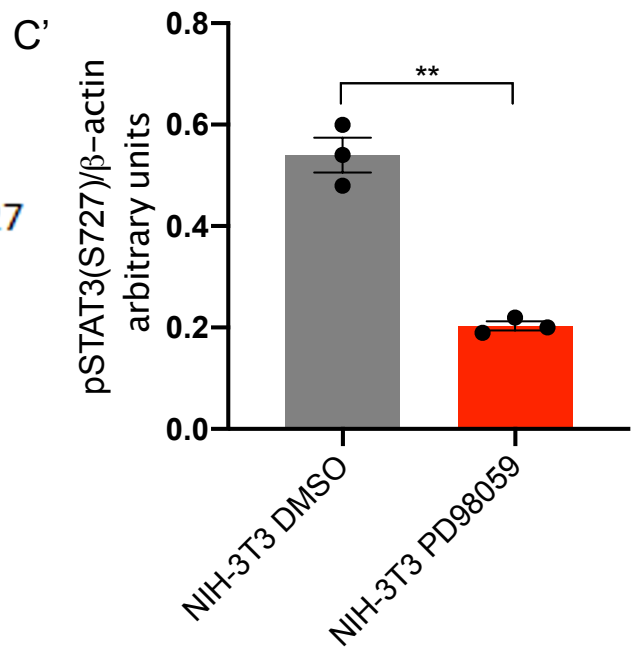

**Fig. S5. Analysis of S727 modification in ESCs and in NIH-3T3 cells. A:** IF with anti-STAT3 and anti-ATAD3 Ab on ESCs *Stat3*<sup>-/-</sup> transiently transfected with the constructs encoding: *mStat3*, *MLS\_mStat3\_NES*, *MLS\_mStat3\_NES S727A* or *mStat3*. Arrows indicate the colocalization of ATAD and STAT3. Scale bar: 200  $\mu$ m. **B:** western blot of mitochondrial STAT3 from ESCs mitochondrial extracts; VDAC1 was used as a mitochondrial loading control, Lamin was used as a nuclear loading control. **C-C'**: qRT-PCR analysis of *mt\_nd2* and *pcna* on 48-hpf larvae treated with either PD98059 12.5  $\mu$ M or DMSO. western blot analysis of pSTAT3 S727 in NIH-3T3 cells treated for 24 hours with 12.5  $\mu$ M PD98059 ( $\beta$ -Actin was used as a loading control). Statistical analysis was performed by unpaired t-test on 3 independent biological samples. \* $p < 0.05$ ; error bars=SEM.



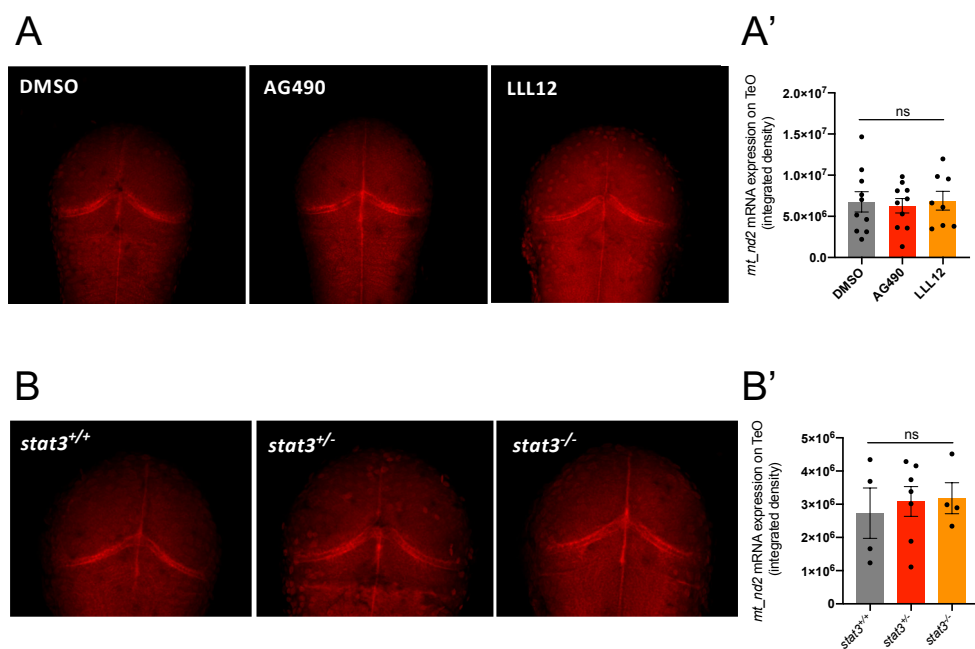

**Fig. S6. *mt\_nd2* mRNA expression is not affected by AG-490 nor in 48-hpf *stat3* mutant larvae.** **A-A'**: FISH with *mt\_nd2* probe in the TeO of 48-hpf larvae treated for 24 hours with AG490. Fluorescence quantification of *mt\_nd2* mRNA levels in the TeO (n=10). **B-B'**: FISH with *mt\_nd2* probe in the TeO of 48-hpf *stat3*<sup>+/+</sup>, *stat3*<sup>+/-</sup>, and *stat3*<sup>-/-</sup> larvae. fluorescence quantification of *mt\_nd2* mRNA levels in the TeO. Statistical analysis was performed by unpaired t-test on 3 independent biological samples. ns = not significant; error bars=SEM.

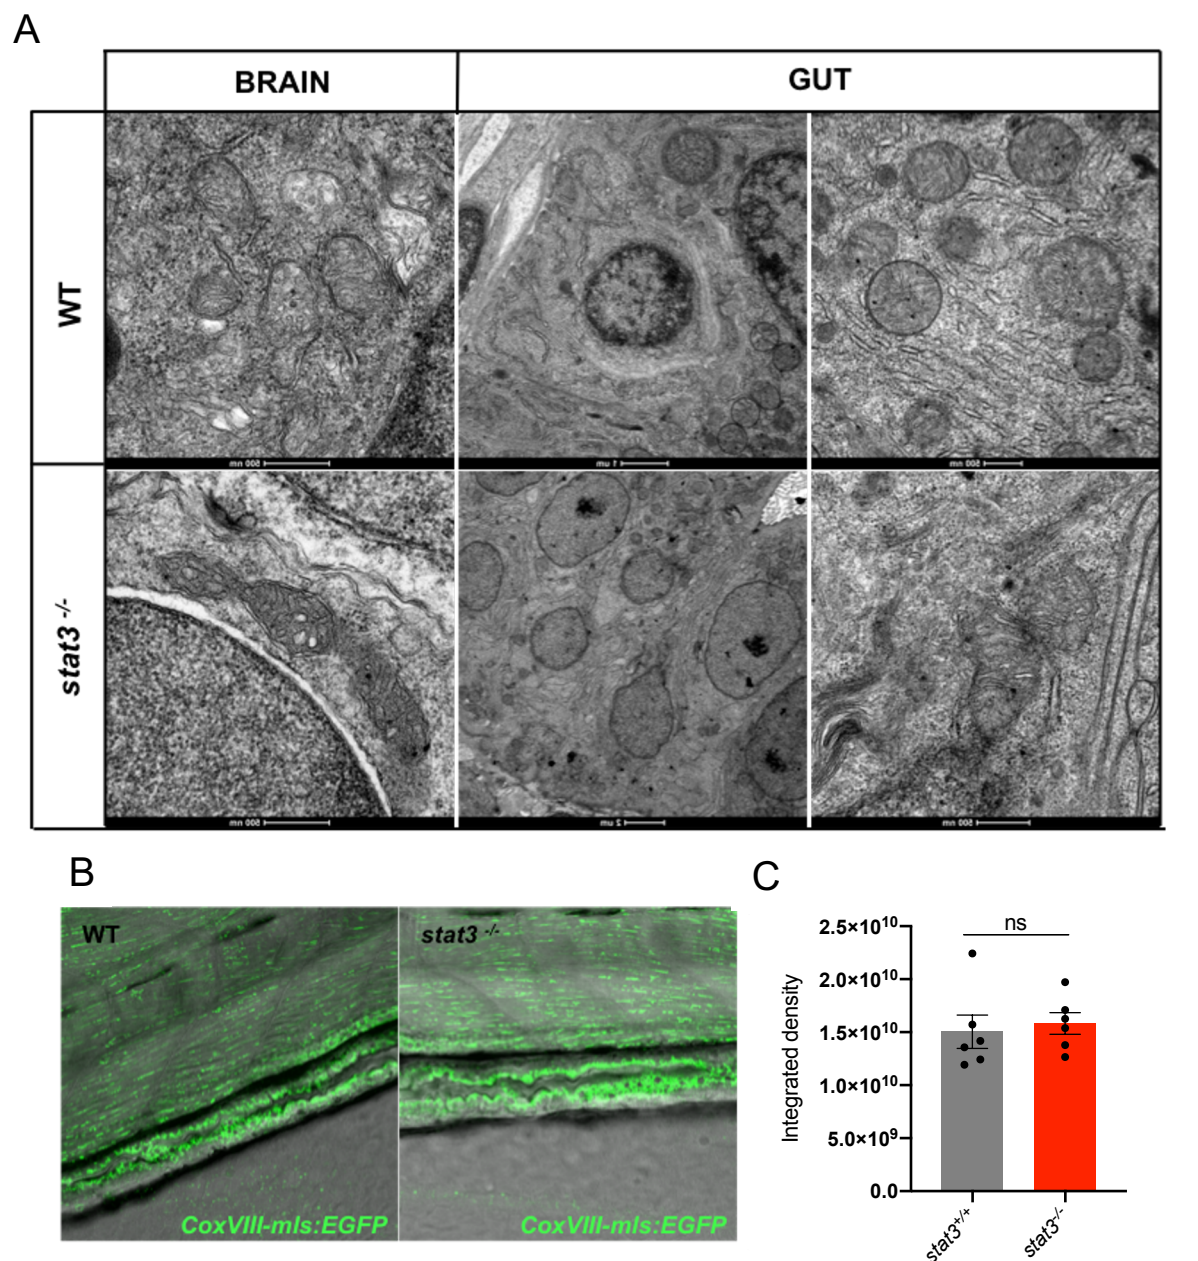

**Fig. S7. Stat3 depletion does not affect mitochondria morphology and biogenesis in the brain and intestine of *stat3*<sup>-/-</sup> larvae.** **A:** TEM analysis of mitochondrial morphology in intestine and brain of 6-dpf *stat3*<sup>-/-</sup> mutants and WT siblings. **B:** EGFP expression in the intestine of 6-dpf *stat3*<sup>-/-</sup>/*Tg(CoxVIII-mls:EGFP)* and WT/*Tg(CoxVIII-mls:EGFP)* siblings (n=6). **C:** Fluorescence quantification of EGFP expression in the intestine of 6-dpf *stat3*<sup>-/-</sup>/*Tg(CoxVIII-mls:EGFP)* and WT/*Tg(CoxVIII-mls:EGFP)* siblings (p-value= 0.,6878). Statistical analysis was performed by unpaired t-test on indicated number of samples; ns = not significant; error bars=SEM.

**Table S1.** List of sgRNAs sequences (5'-3' sequences)

| Exon | Sequence             | Reference                  |
|------|----------------------|----------------------------|
| 14   | GGUCGAUCUUAAGUCCUUGG | Peron <i>et al.</i> (2020) |
| 22   | AGUGAGCUGCUUGGGAA    | This paper                 |
| 23   | AUGAGAGAGUCGAGCGUGCG | This paper                 |

**Table S2.** List of primer used for genotyping (5'-3' sequences)

| Primer               | Primer sequence      | Reference                        |
|----------------------|----------------------|----------------------------------|
| <i>stat3 ex14 fw</i> | GGCCTCTCTGATAGTGACCG | Peron <i>et al.</i> (2020)       |
| <i>stat3 ex14 rv</i> | AGTTGTGCTTAGACGCGATC | Peron <i>et al.</i> (2020)       |
| <i>stat3 ex22 fw</i> | GTGTGTGTGTTAGGCAGGCT | This paper                       |
| <i>stat3 ex22 rv</i> | AGCTCCCTAATGCCTACCCA | This paper                       |
| <i>stat3 ex23 fw</i> | TGCAGGACTAACTCTGGCAA | This paper                       |
| <i>stat3 ex23 rv</i> | GCTTCGTTGTGCATGAGAGA | This paper                       |
| <i>nr3c1 fw</i>      | ACCACTTCAAGCGGACAGAG | Facchinello <i>et al.</i> (2017) |
| <i>nr3c1 rv</i>      | CCGGCTTCTGATCTTTCTGC | Facchinello <i>et al.</i> (2017) |

**Table S3.** List of cloning-related primers (5'-3' sequences)

| Primer name                               | Primer sequence                |
|-------------------------------------------|--------------------------------|
| <i>MLS_STAT3_NES_Y705F fw</i>             | GCTGCCCCGTTCTGAAGACC           |
| <i>MLS_STAT3_NES_Y705F rv</i>             | ACTACCTGGGTCGGCTTC             |
| <i>MLS_STAT3_NES_S727D fw</i>             | CCTGCCGATGGACCCCCGCACT         |
| <i>MLS_STAT3_NES_S727D rv</i>             | TCAATGGTATTGCTGCAGGTC          |
| <i>MLS_STAT3_NES_S727A fw</i>             | CCTGCCGATGGCCCCCGCAC           |
| <i>MLS_STAT3_NES_S727A rv</i>             | TCAATGGTATTGCTGCAGGTCGTTGGTGTC |
| <i>MLS_STAT3_NES_ΔDNA<sub>bd</sub> fw</i> | GGCGATCTCCAACATCTGTCAGATGC     |
| <i>MLS_STAT3_NES_ΔDNA<sub>bd</sub> rv</i> | GCGGCTGGCAAGGAGTGGGTCTC        |

**Table S4.** List of qRT-PCR and RT-PCR primers (5'-3' sequences)

| Gene           | Forward primer sequence | Reverse primer sequence |
|----------------|-------------------------|-------------------------|
| <i>zmt_nd2</i> | GCAGTAGAAGCCACCACAAA    | GCTAGACCGATTTTGAGAGCC   |
| <i>zgapdh</i>  | GTGGAGTCTACTGGTGTCTTC   | GTGCAGGAGGCATTGCTTACA   |
| <i>zpcna</i>   | CCTTGGCACTGGTCTTTGAA    | GGCACACGAGATCATGACAG    |
| <i>zp53</i>    | CAACGTTGGAGCCACTTGAG    | CATCTGCGGACCACTTCAG     |
| <i>zstat1a</i> | GCAGCTCAAGAACTCCTGG     | AAAGGTCTCTGCAGTTGGGT    |
| <i>zbactin</i> | TGGGTATGGAATCTTGCGGT    | GTGGGGCAATGATCTTGATCT   |
| <i>zsocs3a</i> | GGAAGACAAGAGCCGAGACT    | GCGATACACACCAAACCCTG    |
| <i>mSocs3</i>  | ATTCGCTTCGGGACTAGC      | AACTTGCTGTGGGTGACCAT    |
| <i>mStat3</i>  | TGTTGGAGCAGCATCTTCAG    | GAGGTTCTCCACCACCTCA     |
| <i>mbactin</i> | CTAAGGCCAACCGTGAAAAG    | ACCAGAGGGCATAACAGGGACA  |
